# Supplementary material for: Water activation by small free ruthenium oxide clusters
Source: Royal Society of Chemistry journal article supplement (doi:10.1039/c4cp02366h), 2014-08-22
Supplement: c4cp02366h1.pdf [file c4cp02366h1.pdf]

Supplementary Information to:

## Water activation by small free ruthenium oxide clusters

Sandra M. Lang, Thorsten M. Bernhardt,\* Marjan Krstić, and Vlasta Bonačić-Koutecký\*

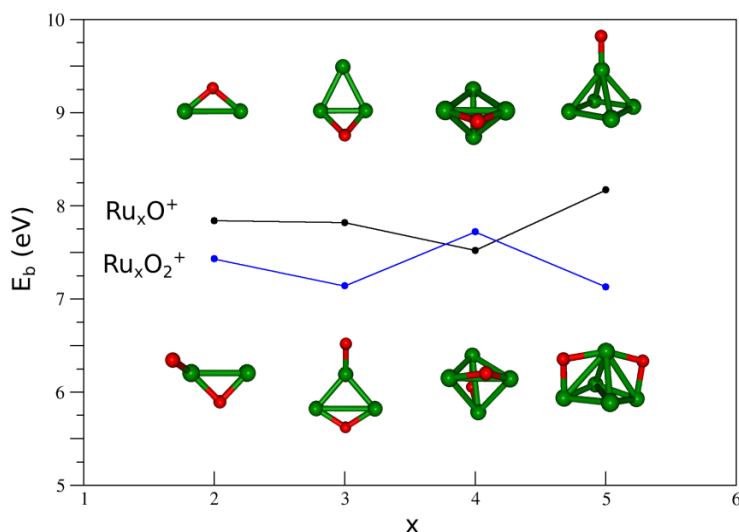

**Fig. S1** Calculated O-atom binding energies for ruthenium mono- and di-oxides together with the corresponding lowest energy structures.  $E_b = E[\text{Ru}_x\text{O}^+] - E[\text{Ru}_x^+] - E[\text{O}]$  and  $E_b = E[\text{Ru}_x\text{O}_2^+] - E[\text{Ru}_x\text{O}^+] - E[\text{O}]$ . Ru and O atoms are indicated by green and red spheres, respectively.

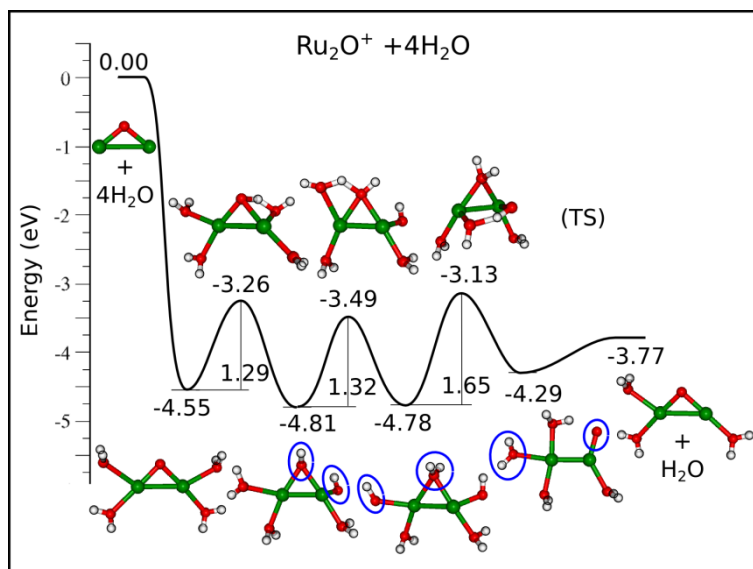

**Fig. S2** Calculated energy profile of one possible reaction pathway for the [1,3] shift hydrogen transfer reaction of  $\text{Ru}_2\text{O}^+ + 4 \text{H}_2\text{O}$  including the lowest energy isomer depicted in Fig. 4b. Ru, O, and H atoms are indicated by green, red, and white spheres, respectively. The blue circles indicate the OH-groups resulting from the stepwise hydrogen shifts.

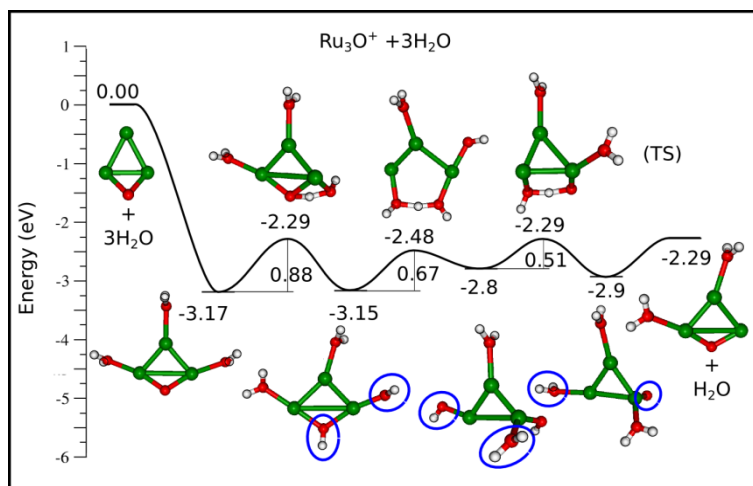

**Fig. S3** Calculated energy profile of one possible reaction pathway for the [1,3] shift hydrogen transfer reaction of  $\text{Ru}_3\text{O}^+ + 3 \text{H}_2\text{O}$  including the lowest energy isomer depicted in Fig. 4d. Ru, O, and H atoms are indicated by green, red, and white spheres, respectively. The blue circles indicate the OH-groups resulting from the stepwise hydrogen shifts.

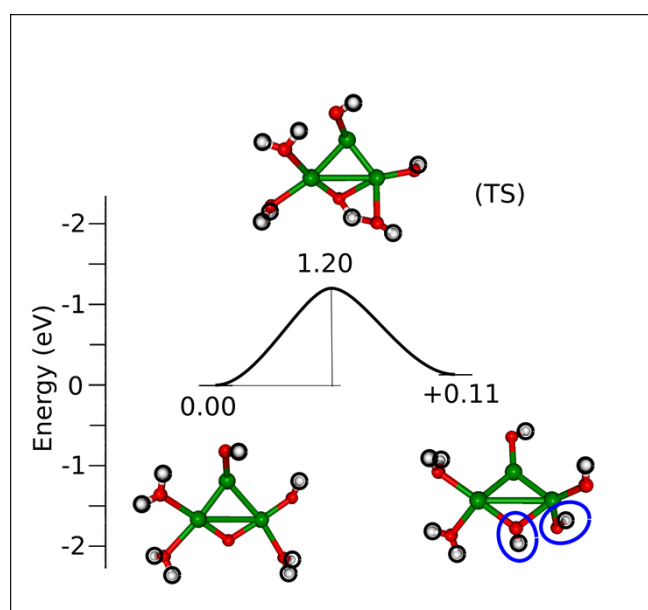

**Fig. S4** Calculated energy profile for one possible reaction pathway for the [1,3] shift hydrogen transfer reaction of  $\text{Ru}_3\text{O}(\text{OH})_2(\text{H}_2\text{O})_3^+$  yielding  $\text{Ru}_3(\text{OH})_4(\text{H}_2\text{O})_2^+$ . The initial structure  $\text{Ru}_3\text{O}(\text{OH})_2(\text{H}_2\text{O})_3^+$  corresponds to the lowest energy isomer depicted in Figs. 4e and 6a. The blue circles indicate the OH-groups resulting from the hydrogen shift.

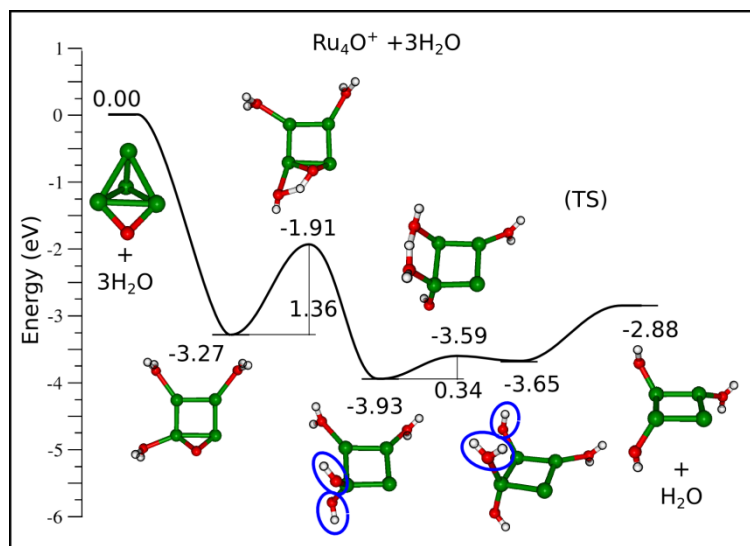

**Fig. S5** Calculated energy profile of one possible reaction pathway for the [1,3]-shift hydrogen transfer reaction of  $\text{Ru}_4\text{O}^+ + 3 \text{H}_2\text{O}$  including the lowest energy isomer depicted in Fig. 4g. Ru, O, and H atoms are indicated by green, red, and white spheres, respectively. The blue circles indicate the OH-groups resulting from the stepwise hydrogen shifts.
